# Supplementary material for: Proteomic analysis highlights the role of detoxification pathways in increased tolerance to Huanglongbing disease
Source: PubMed Central journal article supplement (PMC4963945; doi:10.1186/s12870-016-0858-5), 2016-07-28
Supplement: 12870_2016_858_MOESM3_ESM.pdf [file 12870_2016_858_MOESM3_ESM.pdf]

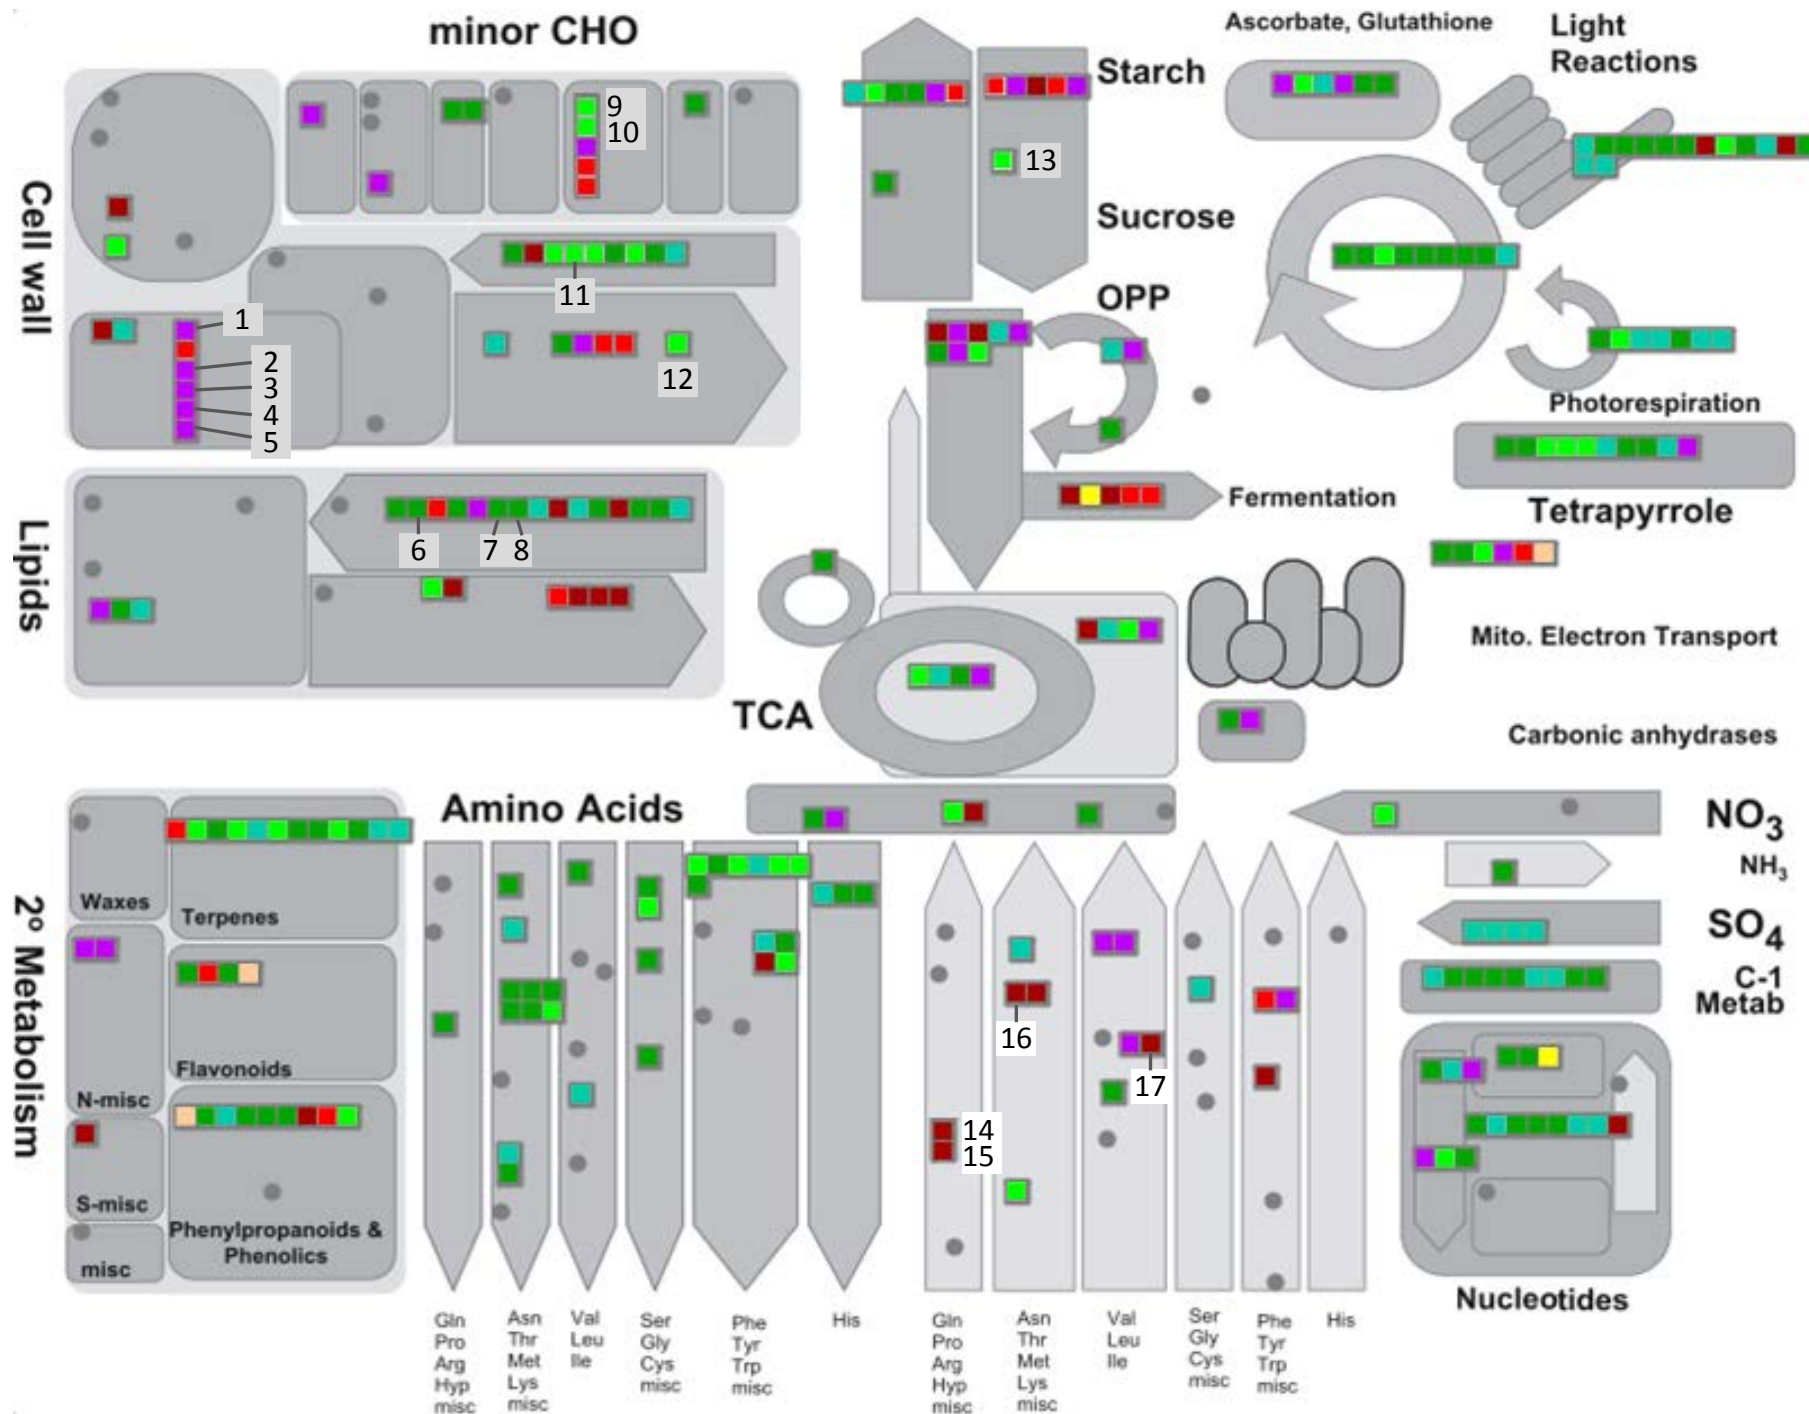

- 1) Expansin A1
- 2) Expansin A8
- 3) Expansin like B1
- 4) Xyloglucan endotransglycosyl. 6
- 5) Xyloglucan-glucosyltransf. (TCH4)
- 6) Acetyl-CoA carboxylase
- 7) 3-oxoacyl reductase
- 8) Enoyl-(acyl-carrier protein)-reductase
- 9) Aldo/keto reductase 1
- 10) Aldo/keto reductase 2
- 11) UDP-glucuronate decarboxylase
- 12) Pectase lyase
- 13) Sucrose synthase 4
- 14) Arginase
- 15) Pyrroline-5-carboxylase reductase
- 16) Lactoylglutathione lyase
- 17) 3-hydroxymethylglutaryl-CoA lyase

Upregulated

- Navel orange
- Volkameriana
- both genotypes

Downregulated

- Navel orange
- Volkameriana
- both genotypes
- Upregulated in navel orange, down in Volkameriana
- Upregulated in Volkameriana, down in navel orange
