# Supplementary material for: Proteomic analysis highlights the role of detoxification pathways in increased tolerance to Huanglongbing disease
Source: PubMed Central journal article supplement (PMC4963945; doi:10.1186/s12870-016-0858-5), 2016-07-28
Supplement: 12870_2016_858_MOESM5_ESM.pdf [file 12870_2016_858_MOESM5_ESM.pdf]

| Treatments                                                                                             | Protein function/name                                         | Accession                                                                                                                  |
|--------------------------------------------------------------------------------------------------------|---------------------------------------------------------------|----------------------------------------------------------------------------------------------------------------------------|
| <b><i>RNA regulation of transcription/RNA processing</i></b>                                           |                                                               |                                                                                                                            |
| 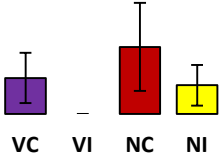 <p>VC VI NC NI</p>   | GATA type zinc finger transcription factor family protein     | orange1.1g029070m<br>orange1.1g029735m                                                                                     |
|  <p>VC VI NC NI</p>   | Transducin/WD40 repeat-like superfamily protein               | orange1.1g039790m                                                                                                          |
| <b><u>Protein targeting/Protein degradation/Protein glycosylation</u></b>                              |                                                               |                                                                                                                            |
|  <p>VC VI NC NI</p>   | Translocon at the inner envelope membrane of chloroplasts 110 | orange1.1g001818m<br>orange1.1g003418m                                                                                     |
|  <p>VC VI NC NI</p>  | Xylem bark cysteine peptidase 3                               | orange1.1g014761m<br>orange1.1g019447m                                                                                     |
|  <p>VC VI NC NI</p> | Aspartic proteinase A1                                        | orange1.1g010466m<br>orange1.1g018226m<br>orange1.1g010486m<br>orange1.1g016523m<br>orange1.1g022584m<br>orange1.1g015145m |
|  <p>VC VI NC NI</p> | Granulin repeat cysteine protease family protein              | orange1.1g024783m                                                                                                          |
|  <p>VC VI NC NI</p> | Regulatory particle triple-A 1A                               | orange1.1g014665m<br>orange1.1g015875m                                                                                     |
|  <p>VC VI NC NI</p> | Vacuolar processing enzyme beta                               | orange1.1g021650m<br>orange1.1g023458m                                                                                     |
|  <p>VC VI NC NI</p> | Ribophorin I                                                  | orange1.1g007137m                                                                                                          |

|                                                                                                        |                                                                                |                                                                                                                                                                      |
|--------------------------------------------------------------------------------------------------------|--------------------------------------------------------------------------------|----------------------------------------------------------------------------------------------------------------------------------------------------------------------|
| 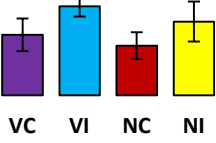 <p>VC VI NC NI</p>   | 20S proteasome alpha subunit E2                                                | orange1.1g042723m<br>orange1.1g030843m                                                                                                                               |
|  <p>VC VI NC NI</p>   | Hydroxyproline-rich glycoprotein family protein                                | orange1.1g016002m<br>orange1.1g020409m<br>orange1.1g022173m                                                                                                          |
| <b>Amino acid metabolism</b>                                                                           |                                                                                |                                                                                                                                                                      |
|  <p>VC VI NC NI</p>   | Putative fumarylacetoacetase                                                   | orange1.1g018339m<br>orange1.1g019941m<br>orange1.1g012786m<br>orange1.1g022156m<br>orange1.1g014784m                                                                |
|  <p>VC VI NC NI</p>   | Putative chorismate synthase / 5-enolpyruvylshikimate-3-phosphate phospholyase | orange1.1g022731m                                                                                                                                                    |
|  <p>VC VI NC NI</p>  | Aspartate aminotransferase                                                     | orange1.1g012095m<br>orange1.1g018665m                                                                                                                               |
|  <p>VC VI NC NI</p> | S-adenosylmethionine synthetase 2                                              | orange1.1g044843m                                                                                                                                                    |
| <b>Stress biotic</b>                                                                                   |                                                                                |                                                                                                                                                                      |
|  <p>VC VI NC NI</p> | Kunitz family trypsin and protease inhibitor protein                           | orange1.1g027419m<br>orange1.1g030834m<br>orange1.1g048141m<br>orange1.1g038462m<br>orange1.1g028238m<br>orange1.1g031474m<br>orange1.1g040351m<br>orange1.1g026834m |
|  <p>VC VI NC NI</p> | Chlorophyllase                                                                 | orange1.1g020188m                                                                                                                                                    |
| <b>Hormone metabolism</b>                                                                              |                                                                                |                                                                                                                                                                      |
|  <p>VC VI NC NI</p> | NAD(P)-linked oxidoreductase superfamily protein                               | orange1.1g019203m                                                                                                                                                    |

|                                                                                                        |                                                                            |                                                                                                                                                                      |
|--------------------------------------------------------------------------------------------------------|----------------------------------------------------------------------------|----------------------------------------------------------------------------------------------------------------------------------------------------------------------|
| 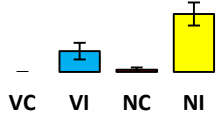 <p>VC VI NC NI</p>   | Lipoxygenase 2                                                             | orange1.1g002649m<br>orange1.1g002672m<br>orange1.1g002644m<br>orange1.1g002706m<br>orange1.1g002670m<br>orange1.1g007674m<br>orange1.1g004307m<br>orange1.1g006999m |
| <b>Secondary metabolism</b>                                                                            |                                                                            |                                                                                                                                                                      |
|  <p>VC VI NC NI</p>   | NAD(P)-binding Rossmann-fold superfamily protein                           | orange1.1g025971m<br>orange1.1g020110m                                                                                                                               |
|  <p>VC VI NC NI</p>   | 1-deoxy-D-xylulose 5-phosphate reductoisomerase                            | orange1.1g012004m<br>orange1.1g013846m                                                                                                                               |
| <b>Other</b>                                                                                           |                                                                            |                                                                                                                                                                      |
|  <p>VC VI NC NI</p>  | Coproporphyrinogen III oxidase<br>(tetrapyrrole synthesis)                 | orange1.1g016102m                                                                                                                                                    |
|  <p>VC VI NC NI</p> | NAD(P)-linked oxidoreductase superfamily protein<br>(minor CHO metabolism) | orange1.1g017732m<br>orange1.1g020098m<br>orange1.1g023567m<br>orange1.1g018530m                                                                                     |
|  <p>VC VI NC NI</p> | Calreticulin 3 (signalling)                                                | orange1.1g014968m<br>orange1.1g015060m<br>orange1.1g020827m                                                                                                          |
|  <p>VC VI NC NI</p> | Glyceraldehyde-3-phosphate dehydrogenase B subunit<br>(calvin cycle)       | orange1.1g012940m<br>orange1.1g025793m<br>orange1.1g015291m<br>orange1.1g021979m                                                                                     |
|  <p>VC VI NC NI</p> | Tubulin alpha-2 chain (cell organisation)                                  | orange1.1g013066m<br>orange1.1g014077m<br>orange1.1g037616m                                                                                                          |
|  <p>VC VI NC NI</p> | Alcohol dehydrogenase 1 (fermentation)                                     | orange1.1g047713m<br>orange1.1g035170m<br>orange1.1g017336m<br>orange1.1g016933m<br>orange1.1g019414m                                                                |

|                                                                                                        |                                                                              |                                                                                                                            |
|--------------------------------------------------------------------------------------------------------|------------------------------------------------------------------------------|----------------------------------------------------------------------------------------------------------------------------|
| 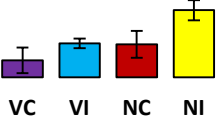 <p>VC VI NC NI</p>   | Transducin family protein / WD-40 repeat family protein (development)        | orange1.1g010997m<br>orange1.1g016547m<br>orange1.1g046899m<br>orange1.1g021657m                                           |
|  <p>VC VI NC NI</p>   | ATPase F1 complex, gamma subunit protein (lightreaction)                     | orange1.1g017613m                                                                                                          |
|  <p>VC VI NC NI</p>   | Glutamate synthase 1 (N-metabolism)                                          | orange1.1g000461m                                                                                                          |
| <b>Miscellaneous</b>                                                                                   |                                                                              |                                                                                                                            |
|  <p>VC VI NC NI</p>   | D-mannose binding lectin protein with Apple-like carbohydrate-binding domain | orange1.1g048464m<br>orange1.1g041743m                                                                                     |
|  <p>VC VI NC NI</p>  | O-Glycosyl hydrolases family 17 protein                                      | orange1.1g019362m                                                                                                          |
|  <p>VC VI NC NI</p> | Glutathione s-transferase tau 7                                              | orange1.1g027333m<br>orange1.1g027498m<br>orange1.1g043218m                                                                |
|  <p>VC VI NC NI</p> | Alpha/beta-Hydrolases superfamily protein                                    | orange1.1g023687m<br>orange1.1g031524m                                                                                     |
|  <p>VC VT NC NT</p> | Zinc-binding dehydrogenase family protein                                    | orange1.1g037444m<br>orange1.1g039200m<br>orange1.1g018404m                                                                |
|  <p>VC VI NC NI</p> | Zinc-binding dehydrogenase family protein                                    | orange1.1g019042m<br>orange1.1g042426m<br>orange1.1g033914m<br>orange1.1g026217m<br>orange1.1g019332m<br>orange1.1g019291m |
|  <p>VC VI NC NI</p> | Glycosyl hydrolase family 38 protein                                         | orange1.1g015028m<br>orange1.1g011547m                                                                                     |

|                                                                                                        |                                                             |                                                                                                                            |
|--------------------------------------------------------------------------------------------------------|-------------------------------------------------------------|----------------------------------------------------------------------------------------------------------------------------|
| 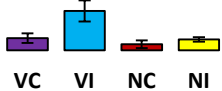 <p>VC VI NC NI</p>   | Glycosyl hydrolase family 38 protein                        | orange1.1g002036m<br>orange1.1g002170m<br>orange1.1g002764m                                                                |
|  <p>VC VI NC NI</p>   | Pectin methylesterase inhibitor superfamily protein         | orange1.1g029238m<br>orange1.1g027094m                                                                                     |
| <b>Unknown</b>                                                                                         |                                                             |                                                                                                                            |
|  <p>VC VI NC NI</p>   | DC1 domain-containing protein                               | orange1.1g008336m<br>orange1.1g011791m<br>orange1.1g013684m<br>orange1.1g021494m<br>orange1.1g014225m<br>orange1.1g015833m |
|  <p>VC VI NC NI</p>   | Class I glutamine amidotransferase-like superfamily protein | orange1.1g016237m<br>orange1.1g029299m                                                                                     |
|  <p>VC VI NC NI</p> | Thioredoxin family protein                                  | orange1.1g024026m<br>orange1.1g023026m                                                                                     |
